# Supplementary material for: A predicted structure of NADPH Oxidase 1 identifies key components of ROS generation and strategies for inhibition
Source: PubMed Central journal article supplement (PMC10155968; doi:10.1371/journal.pone.0285206), 2023-05-03
Supplement: pone.0285206.s001.pdf [file pone.0285206.s001.pdf]

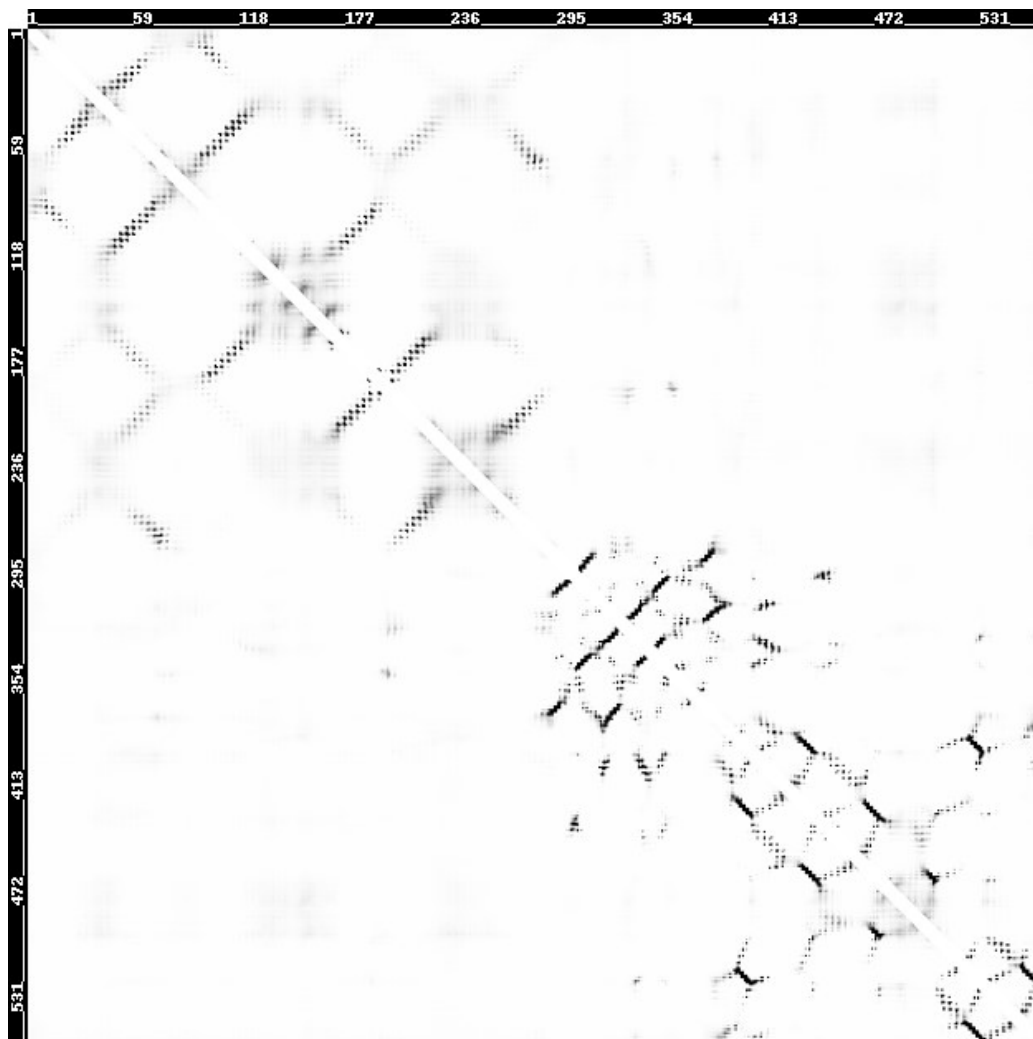

**S1 Fig. Local contact map of the predicted NOX1 structure model.** Protein contacts were predicted and visualized using RaptorX.
