# Supplementary material for: A predicted structure of NADPH Oxidase 1 identifies key components of ROS generation and strategies for inhibition
Source: PubMed Central journal article supplement (PMC10155968; doi:10.1371/journal.pone.0285206), 2023-05-03
Supplement: pone.0285206.s002.pdf [file pone.0285206.s002.pdf]

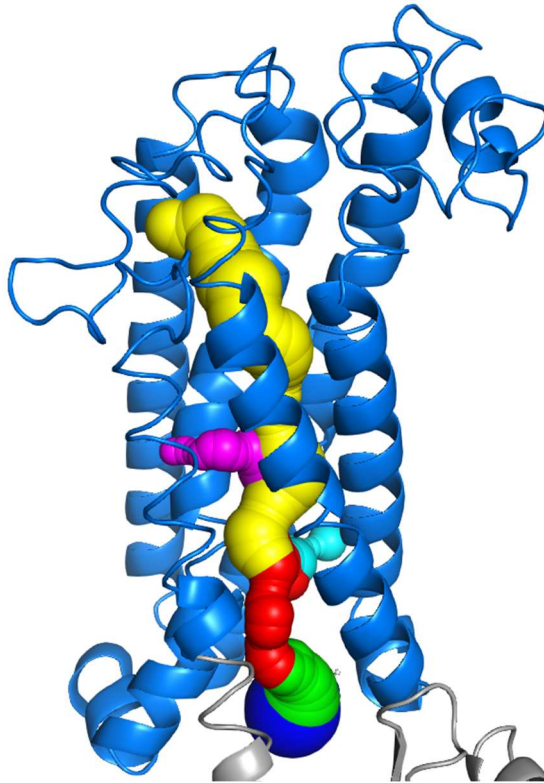

**S2 Fig. Electron transport channels in predicted NOX1 6-TM domain.** Channels were visualized with default settings using CAVER PyMOL 3.0 Plugin.
