# Supplementary material for: A predicted structure of NADPH Oxidase 1 identifies key components of ROS generation and strategies for inhibition
Source: PubMed Central journal article supplement (PMC10155968; doi:10.1371/journal.pone.0285206), 2023-05-03
Supplement: pone.0285206.s003.pdf [file pone.0285206.s003.pdf]

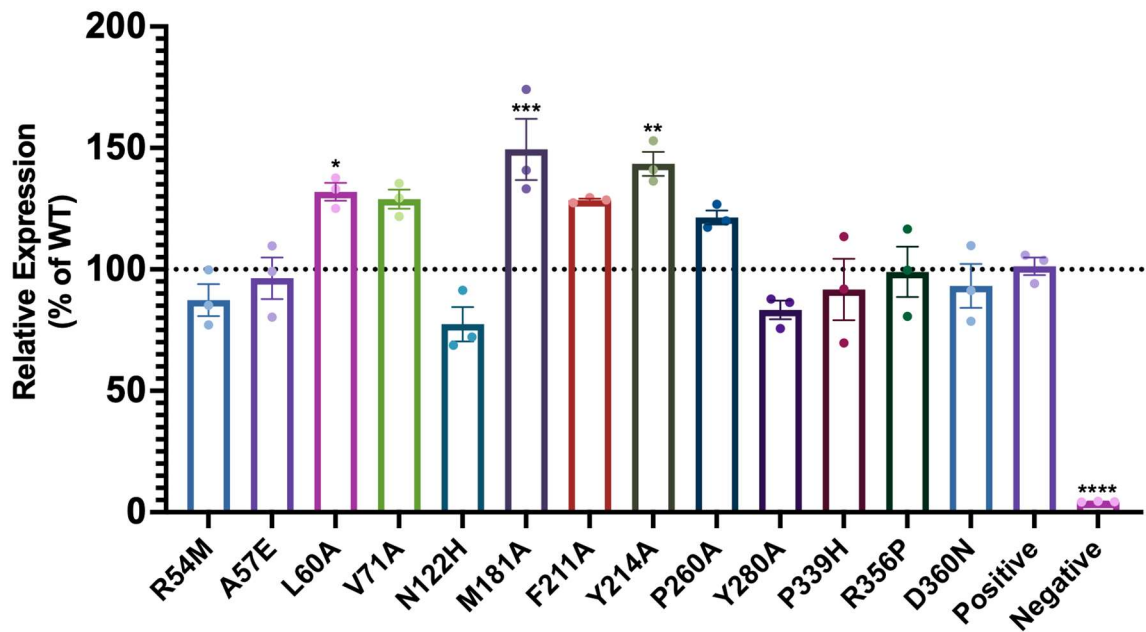

**S3 Fig. Cell surface expression of NOX1 mutants.** Wild-type NOX1 and its mutants were transiently expressed in HEK293 cells. After 24 h, cell surface expressed NOX1 was labelled by an anti-NOX1 FITC antibody and analyzed by flow cytometry. Mean fluorescence intensity was collected and analyzed for NOX1 expression. Baseline signals were detected in antibody-stained cells transfected with empty plasmids (negative control). Relative expression level was calculated as the percentage ratio against the wild-type NOX1 (100%, indicated by the dotted line). Data shown are means  $\pm$  SEM of three independent experiments.
