# Supplementary material for: A predicted structure of NADPH Oxidase 1 identifies key components of ROS generation and strategies for inhibition
Source: PubMed Central journal article supplement (PMC10155968; doi:10.1371/journal.pone.0285206), 2023-05-03
Supplement: pone.0285206.s005.pdf [file pone.0285206.s005.pdf]

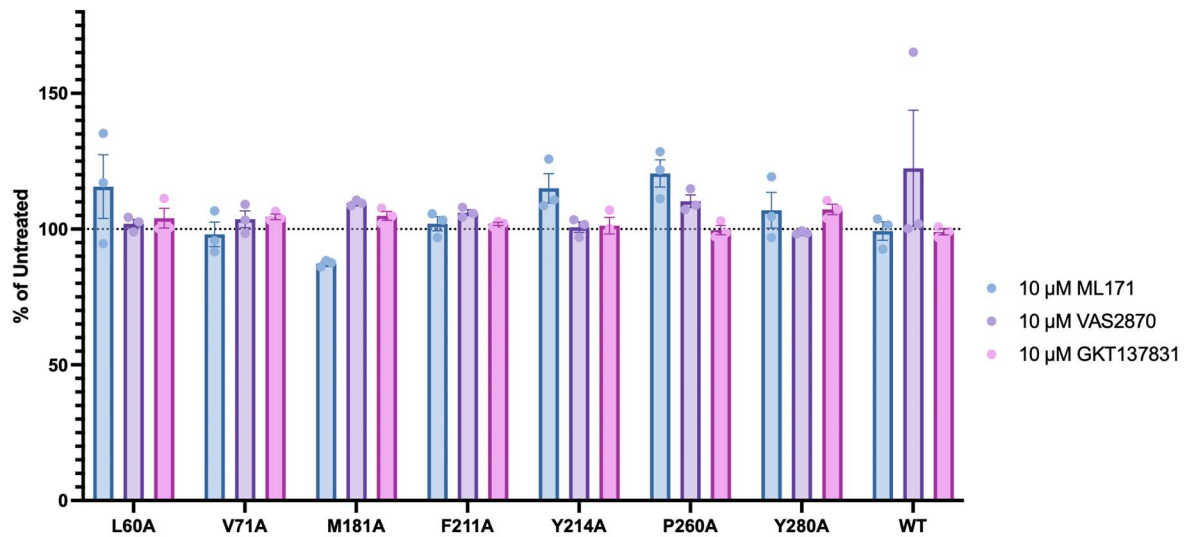

|              | Treated_10 μM ML171 | Treated_10 μM VAS2870 | Treated_10 μM GKT137831 |
|--------------|---------------------|-----------------------|-------------------------|
| WT vs. L60A  | ns                  | * (p=0.0279)          | ns                      |
| WT vs. V71A  | ns                  | ns                    | ns                      |
| WT vs. M181A | ns                  | ns                    | ns                      |
| WT vs. F211A | ns                  | ns                    | ns                      |
| WT vs. Y214A | ns                  | * (p=0.0172)          | ns                      |
| WT vs. P260A | * (p=0.0208)        | ns                    | ns                      |
| WT vs. Y280A | ns                  | ** (p=0.0076)         | ns                      |

**S5 Fig. Cell surface expression of NOX1 upon inhibitor treatments.** Wild-type NOX1 and its mutants, along with NOXA1 and NOXO1, were transiently expressed in HEK293 cells. Samples were treated with 10 μM small-molecule inhibitors or HBSS control, respectively for 30 mins prior to antibody staining. Cell surface expressed NOX1 was labeled by an anti-NOX1 FITC antibody and analyzed by flow cytometry. Mean fluorescence intensity was analyzed for NOX1 expression. Relative expression level was calculated as the percentage ratio against the sample of wild-type/mutant NOX1 treated with HBSS (100%, indicated by the dotted line). Data shown are means ± SEM of three independent experiments. Two-way ANOVA was performed and comparison test results are attached in the table. ns stands for not significant, whereas the *p* values are listed for significant comparisons.
