# Supplementary material for: A predicted structure of NADPH Oxidase 1 identifies key components of ROS generation and strategies for inhibition
Source: PubMed Central journal article supplement (PMC10155968; doi:10.1371/journal.pone.0285206), 2023-05-03
Supplement: pone.0285206.s006.pdf [file pone.0285206.s006.pdf]

**S1 Table. Summary of binding sites of tFold-predicted NOX1 structure model.**

| <b>Molecules</b> | <b>Binding Sites</b>                                 |
|------------------|------------------------------------------------------|
| Heme1            | ARG54, ARG57, ASN122, ARG258                         |
| Heme2            | HIS101, HIS208, ARG197, PHE204, LYS98, LYS102        |
| FAD              | ARG356, PRO533, PRO339, ILE405                       |
| NADPH            | ASN450, SER454, ALA345, GLU348, LEU491               |
| GKT136901        | LEU68, VAL71, ARG73, PHE211, TRP205, TYR280, ARG284  |
| GKT137831        | LEU50, GLN230, ASN122, PRO260, GLU263, PHE262        |
| VAS2870          | VAL71, ARG73, TRP205, PHE211, TYR280, ARG284, ARG287 |
| VAS3947          | LEU50, ARG54, PRO260, PHE262, LEU58, GLN230          |
| ML090            | ARG54, PHE211, TYR214, PHE262, TYR280                |
| ML171            | ILE67, SER64, ALA192, HIS208, PHE211, TYR214         |
